# Supplementary material for: GABA-A Alpha 2/3 but Not Alpha 1 Receptor Subunit Ligand Inhibits Harmaline and Pimozide-Induced Tremor in Rats
Source: MDPI journal article supplement (doi:10.3390/biom13020197), 2023-01-18

# Supplementary Results

## **GABA-A alpha 2/3 but not alpha 1 receptor subunit ligand inhibits harmaline and pimozide-induced tremor in rats**

Barbara Kosmowska<sup>1</sup>, Martyna Paleczna<sup>1</sup>, Dominika Biała<sup>1</sup>, Justyna Kadłuczka<sup>1</sup>, Jadwiga Wardas<sup>1</sup>, Jeffrey M. Witkin<sup>2,3</sup>, James M. Cook<sup>2,3</sup>, Dishary Sharmin<sup>2</sup>, Monika Marcinkowska<sup>4</sup>, Katarzyna Z. Kuter<sup>1\*</sup>

<sup>1</sup> Department of Neuropsychopharmacology, Maj Institute of Pharmacology, Polish Academy of Sciences, 12 Smetna St., 31-343 Krakow, Poland

<sup>2</sup> Department of Chemistry and Biochemistry, University of Wisconsin-Milwaukee, Milwaukee, WI, USA

<sup>3</sup> RespireRx Pharmaceuticals Inc, Glen Rock, NJ, USA

<sup>4</sup> Department of Pharmaceutical Chemistry, Jagiellonian University, Medical College, 9 Medyczna St., 30-688 Krakow, Poland

\* Correspondence: [kuter@if-pan.krakow.pl](mailto:kuter@if-pan.krakow.pl); Tel.: +48 12 6623226

Figure S1. Tremolous Jaw Movements and Catalepsy induced in Wistar rat by 7 doses of Pimozide.

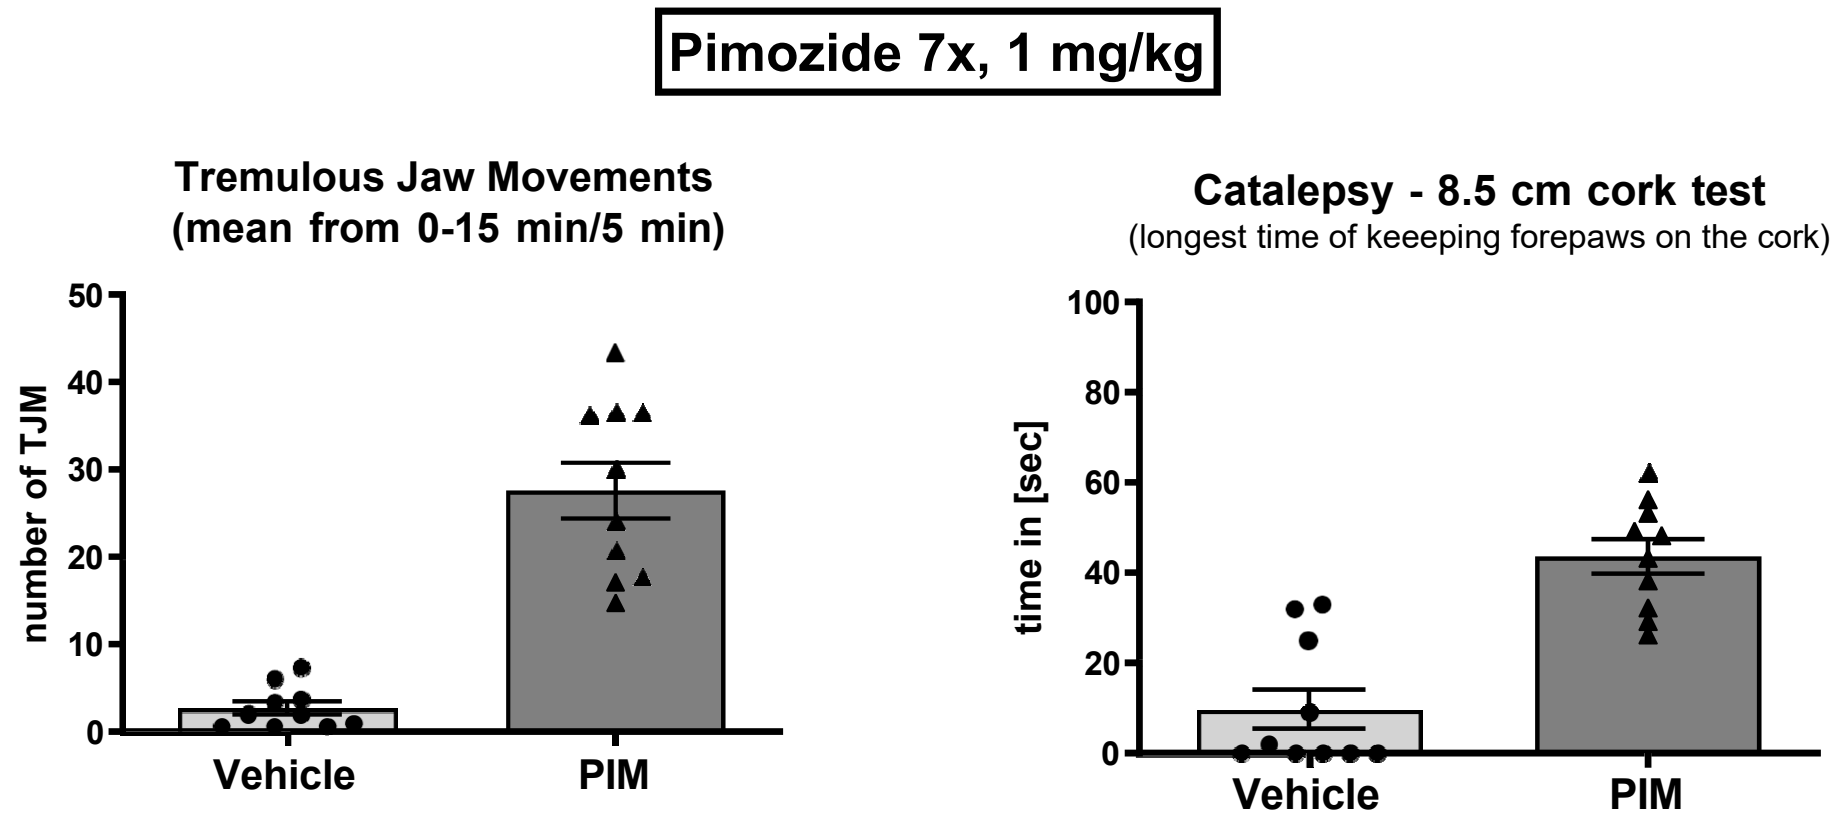

Barbara Kosmowska and Jadwiga Wardas

Figure S2. Tremolous Jaw Movements and Catalepsy induced in Wistar rat by 1 dose of Tetrabenazine.

## TJMs - Tetrabenazine 2 mg/kg (1x)

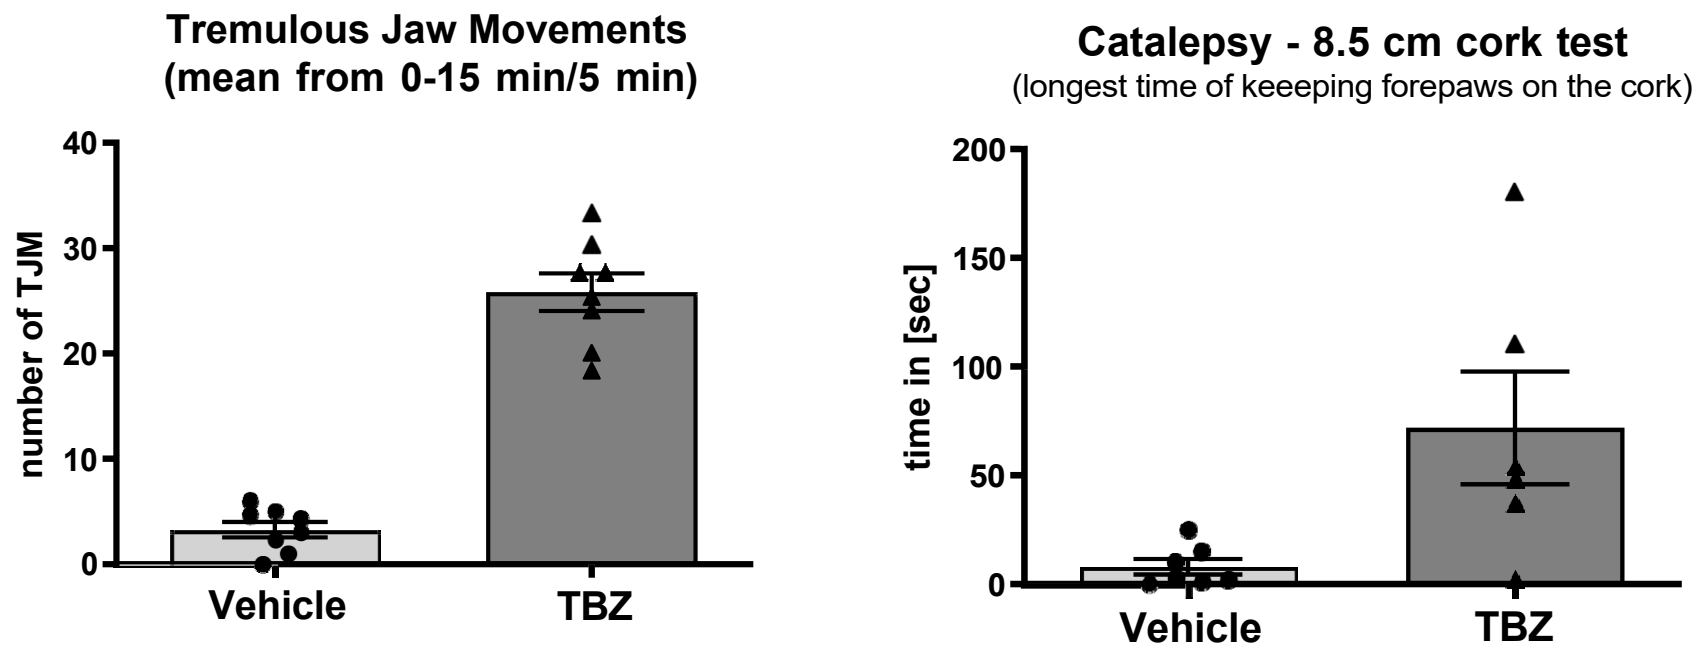

Barbara Kosmowska and Jadwiga Wardas

Figure S3. Walking distance affected by Pimozide or Tetrabenazine, measured in Force Plate Actimeters (BASi, West Lafayette, IN, USA)

# Walking distance

PIMOZIDE 1 mg/kg, 7x

Distance

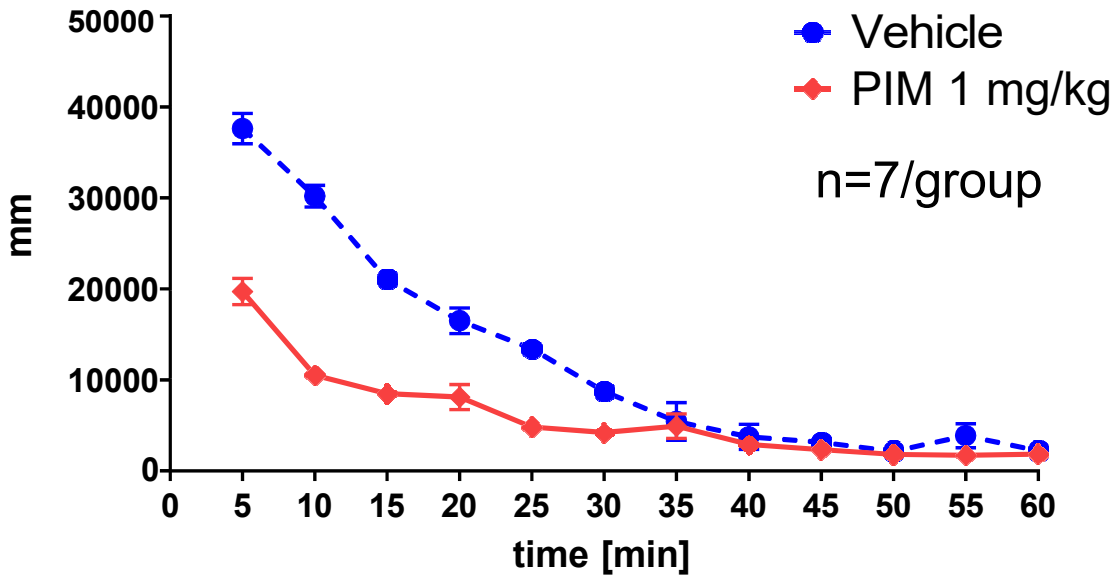

TETRABENAZINE 2 mg/kg, 1x

Distance

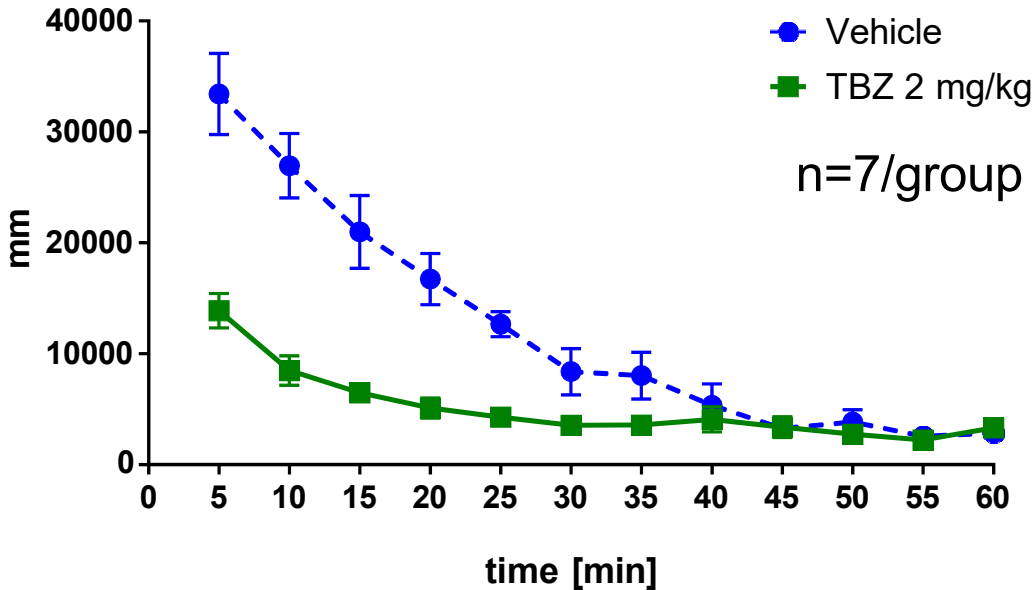

Supplement: s1 [file s1]
